# Supplementary material for: The Zika Contraception Access Network: a feasibility programme to increase access to contraception in Puerto Rico during the 2016–17 Zika virus outbreak
Source: PubMed Central journal article supplement (PMC5846878; doi:10.1016/s2468-2667(18)30001-x), 2018-01-19
Supplement: mmc1.pdf [file mmc1.pdf]

# THE LANCET

## Public Health

### Supplementary appendix

This appendix formed part of the original submission and has been peer reviewed. We post it as supplied by the authors.

Supplement to: Lathrop E, Romero L, Hurst S, et al. The Zika Contraception Access Network: a feasibility programme to increase access to contraception in Puerto Rico during the 2016–17 Zika virus outbreak. *Lancet Public Health* 2018; published online Jan 18. [http://dx.doi.org/10.1016/S2468-2667\(18\)30001-X](http://dx.doi.org/10.1016/S2468-2667(18)30001-X).

**Appendix: Survey items used to measure patient perception of quality of care in the Z-CAN patient satisfaction survey<sup>a</sup> and findings**

| <b>On a scale of 1 to 5, with <i>1 meaning poor and 5 meaning excellent</i>, please rate your experience with your Z-CAN provider(s) (doctor, nurse, and/or counselor) that you saw according to the following qualities:</b> | <b>1=Poor</b>  | <b>2=Fair</b>  | <b>3=Good</b>  | <b>4=Very good</b> | <b>5=Excellent</b> |
|-------------------------------------------------------------------------------------------------------------------------------------------------------------------------------------------------------------------------------|----------------|----------------|----------------|--------------------|--------------------|
| Respecting me as a person.                                                                                                                                                                                                    | 9/3428 (0·3)   | 21/3428 (0·6)  | 63/3428 (1·8)  | 226/3428 (6·6)     | 2719/3428 (79·3)   |
| Showing care and compassion.                                                                                                                                                                                                  | 18/3428 (0·5)  | 22/3428 (0·6)  | 93/3428 (2·7)  | 260/3428 (7·6)     | 2641/3428 (77·0)   |
| Letting me say what mattered to me about my birth control method.                                                                                                                                                             | 12/3428 (0·4)  | 27/3428 (0·8)  | 108/3428 (3·2) | 259/3428 (7·6)     | 2627/3428 (76·6)   |
| Giving me an opportunity to ask questions.                                                                                                                                                                                    | 19/3428 (0·6)  | 25/3428 (0·7)  | 94/3428 (2·7)  | 208/3428 (6·1)     | 2690/3428 (78·5)   |
| Taking my preferences about my birth control seriously.                                                                                                                                                                       | 22/3428 (0·6)  | 30/3428 (0·9)  | 90/3428 (2·6)  | 251/3428 (7·3)     | 2642/3428 (77·1)   |
| Considering my personal situation when advising me about birth control.                                                                                                                                                       | 32/3428 (0·9)  | 37/3428 (1·1)  | 116/3428 (3·4) | 255/3428 (7·4)     | 2588/3428 (75·5)   |
| Working out a plan for my birth control with me.                                                                                                                                                                              | 138/3428 (4·0) | 102/3428 (3·0) | 248/3428 (7·2) | 368/3428 (10·7)    | 2171/3428 (63·3)   |
| Giving me enough information to make the best decision about my birth control method.                                                                                                                                         | 28/3428 (0·8)  | 63/3428 (1·8)  | 117/3428 (3·4) | 248/3428 (7·2)     | 2572/3428 (75·0)   |
| Telling me how to take or use my birth control method most effectively.                                                                                                                                                       | 24/3428 (0·7)  | 35/3428 (1·0)  | 126/3428 (3·7) | 241/3428 (7·0)     | 2605/3428 (76·0)   |
| Telling me the risks and benefits of the birth control method I chose.                                                                                                                                                        | 64/3428 (1·9)  | 78/3428 (2·3)  | 135/3428 (3·9) | 297/3428 (8·7)     | 2454/3428 (71·6)   |
| Answering all of my questions.                                                                                                                                                                                                | 17/3428 (0·5)  | 42/3428 (1·2)  | 108/3428 (3·2) | 232/3428 (6·8)     | 2629/3428 (76·7)   |

<sup>a</sup> Adapted from Dehlendorf C, Henderson JT, Vittinghoff E, Grumbach K, Levy K, Schmittdiel J, et al. Association of the quality of interpersonal care during family planning counseling with contraceptive use. *Am J Obstet Gynecol.* 2016;215(1):78.e1–9.

Note: Proportions may not add to 100% due to missing data.
